# Supplementary material for: A highly efficient microwave-assisted synthesis of an LED-curable methacrylated gelatin for bio applications
Source: PubMed Central journal article supplement — RSC Adv. 2021 Apr 21;11(25):14996–5009. doi: 10.1039/d1ra01269j (PMC8697925; doi:10.1039/d1ra01269j), 2021-04-21
Supplement: RA-011-D1RA01269J-s001.pdf [file RA-011-D1RA01269J-s001.pdf]

## Electronic supplementary information (ESI)

# A Highly Efficient Microwave-Assisted Synthesis of an LED-Curable Methacrylated Gelatin for Bio Applications

Sahar Abdollahi Baghban<sup>a</sup>, Morteza Ebrahimi<sup>\*a</sup>, Shadab Bagheri-Khoulenjani<sup>a</sup>, Manoucher Khorasani<sup>a</sup>

Department of Polymer and Color Engineering, Amirkabir University of Technology, 350 Hafez Ave.,  
15875-4413 Tehran, Iran.

\* Email of corresponding author: Ebrahimi@aut.ac.ir

### Table of contents

|                                                                            | Page |
|----------------------------------------------------------------------------|------|
| Table S1- Formulations and process conditions for the synthesis of GelMAs. | 2    |
| SS1- Dielectric constant ( $\epsilon_r$ ) calculation method               | 4    |
| Equation S1                                                                | 4    |
| SS2- Dipole moment calculation procedures                                  | 5    |
| SS3- Dipole moment calculation of GMA                                      | 5    |
| SS3-1- Geometric optimization of GMA                                       | 5    |
| SS3-2- Conformers and dipole moment of GMA                                 | 8    |
| SS4- Dipole moment calculation of MA                                       | 9    |
| SS4-1- Geometric optimization of MA                                        | 9    |
| SS4-2- Conformers and dipole moment of MA                                  | 11   |
| SR-References                                                              | 13   |

### Figure captions

|                                                                                                                                                            |    |
|------------------------------------------------------------------------------------------------------------------------------------------------------------|----|
| Figure S1- Clear yellowish viscous dialyzed MWA-synthesized GelMA solutions, A: GMA-GelMA and B: MA-GelMA.                                                 | 3  |
| Figure S2- MWA-synthesized GelMA powder after freeze-dry, A: GMA-GelMA and B: MA-GelMA.                                                                    | 3  |
| Figure S3- UV-Vis spectrum and molar absorptivity of the VA-086 ( $\epsilon_{374} = 26.12 \text{ L mol}^{-1}\text{cm}^{-1}$ ) in DMSO solvent (0.1 mol/L). | 4  |
| Figure S4- Spectral power distribution of custom-made blue LED light source.                                                                               | 4  |
| Figure S5- Forcite geometry optimization A: Energy and B: Convergence of GMA.                                                                              | 6  |
| Figure S6- Geometry optimized molecular structures of GMA.                                                                                                 | 7  |
| Figure S7- A: Energy and B: RMS deviation of all of the possible spatial conformers of GMA.                                                                | 7  |
| Figure S8- Forcite geometry optimization A: Energy and B: Convergence of MA.                                                                               | 10 |
| Figure S9- Geometry optimized molecular structures of MA.                                                                                                  | 10 |
| Figure S10- A: Energy and B: RMS deviation of all of the possible spatial conformers of MA.                                                                | 11 |
| Figure S11- Tensile (stress-strain) curves of the LED-cured GelMA hydrogels.                                                                               | 12 |

**Table S1- Formulations and process conditions for the synthesis of GelMAs.**

| No | Code            | Methacrylation reagent | Methacrylation reagent concentration | Methacrylation time (min) | MW power (W) | Appearance of GelMA solution after 10 min |
|----|-----------------|------------------------|--------------------------------------|---------------------------|--------------|-------------------------------------------|
| 1  | MW-G-5-1-100    | GMA                    | 5 x                                  | 1 (30 s×2 cycles)         | 100          | One phase                                 |
| 2  | MW-G-5-1-500    | GMA                    | 5 x                                  | 1 (30 s×2 cycles)         | 500          | One phase                                 |
| 3  | MW-G-5-1-1000   | GMA                    | 5 x                                  | 1 (30 s×2 cycles)         | 1000         | One phase                                 |
| 4  | MW-G-5-5-100    | GMA                    | 5 x                                  | 5 (30 s×10 cycles)        | 100          | One phase                                 |
| 5  | MW-G-5-5-500    | GMA                    | 5 x                                  | 5 (30 s×10 cycles)        | 500          | One phase                                 |
| 6  | MW-G-5-5-1000   | GMA                    | 5 x                                  | 5 (30 s×10 cycles)        | 1000         | Two phases                                |
| 7  | MW-G-5-10-100   | GMA                    | 5 x                                  | 10 (30 s×20 cycles)       | 100          | One phase                                 |
| 8  | MW-G-5-10-500   | GMA                    | 5 x                                  | 10 (30 s×20 cycles)       | 500          | Two phases                                |
| 9  | MW-G-5-10-1000  | GMA                    | 5 x                                  | 10 (30 s×20 cycles)       | 1000         | Two phases                                |
| 10 | MW-G-10-1-100   | GMA                    | 10 x                                 | 1 (30 s×2 cycles)         | 100          | One phase                                 |
| 11 | MW-G-10-1-500   | GMA                    | 10 x                                 | 1 (30 s×2 cycles)         | 500          | One phase                                 |
| 12 | MW-G-10-1-1000  | GMA                    | 10 x                                 | 1 (30 s×2 cycles)         | 1000         | One phase                                 |
| 13 | MW-G-10-5-100   | GMA                    | 10 x                                 | 5 (30 s×10 cycles)        | 100          | One phase                                 |
| 14 | MW-G-10-5-500   | GMA                    | 10 x                                 | 5 (30 s×10 cycles)        | 500          | Two phases                                |
| 15 | MW-G-10-5-1000  | GMA                    | 10 x                                 | 5 (30 s×10 cycles)        | 1000         | Two phases                                |
| 16 | MW-G-10-10-100  | GMA                    | 10 x                                 | 10 (30 s×20 cycles)       | 100          | One phase                                 |
| 17 | MW-G-10-10-500  | GMA                    | 10 x                                 | 10 (30 s×20 cycles)       | 500          | Two phases                                |
| 18 | MW-G-10-10-1000 | GMA                    | 10 x                                 | 10 (30 s×20 cycles)       | 1000         | Two phases                                |
| 19 | MW-M-5-1-100    | MA                     | 5 x                                  | 1 (30 s×2 cycles)         | 100          | One phase                                 |
| 20 | MW-M-5-1-500    | MA                     | 5 x                                  | 1 (30 s×2 cycles)         | 500          | One phase                                 |
| 21 | MW-M-5-1-1000   | MA                     | 5 x                                  | 1 (30 s×2 cycles)         | 1000         | One phase                                 |
| 22 | MW-M-5-5-100    | MA                     | 5 x                                  | 5 (30 s×10 cycles)        | 100          | One phase                                 |
| 23 | MW-M-5-5-500    | MA                     | 5 x                                  | 5 (30 s×10 cycles)        | 500          | Two phases                                |
| 24 | MW-M-5-5-1000   | MA                     | 5 x                                  | 5 (30 s×10 cycles)        | 1000         | Two phases                                |
| 25 | MW-M-5-10-100   | MA                     | 5 x                                  | 10 (30 s×20 cycles)       | 100          | One phase                                 |
| 26 | MW-M-5-10-500   | MA                     | 5 x                                  | 10 (30 s×20 cycles)       | 500          | Two phases                                |
| 27 | MW-M-5-10-1000  | MA                     | 5 x                                  | 10 (30 s×20 cycles)       | 1000         | Two phases                                |
| 28 | MW-M-10-1-100   | MA                     | 10 x                                 | 1 (30 s×2 cycles)         | 100          | One phase                                 |
| 29 | MW-M-10-1-500   | MA                     | 10 x                                 | 1 (30 s×2 cycles)         | 500          | One phase                                 |
| 30 | MW-M-10-1-1000  | MA                     | 10 x                                 | 1 (30 s×2 cycles)         | 1000         | Two phases                                |
| 31 | MW-M-10-5-100   | MA                     | 10 x                                 | 5 (30 s×10 cycles)        | 100          | One phase                                 |
| 32 | MW-M-10-5-500   | MA                     | 10 x                                 | 5 (30 s×10 cycles)        | 500          | Two phases                                |
| 33 | MW-M-10-5-1000  | MA                     | 10 x                                 | 5 (30 s×10 cycles)        | 1000         | Two phases                                |
| 34 | MW-M-10-10-100  | MA                     | 10 x                                 | 10 (30 s×20 cycles)       | 100          | One phase                                 |
| 35 | MW-M-10-10-500  | MA                     | 10 x                                 | 10 (30 s×20 cycles)       | 500          | Two phases                                |
| 36 | MW-M-10-10-1000 | MA                     | 10 x                                 | 10 (30 s×20 cycles)       | 1000         | Two phases                                |
| 37 | C-G-5           | GMA                    | 5 x                                  | 240                       | NA*          | One phase                                 |
| 38 | C-G-10          | GMA                    | 10 x                                 | 240                       | NA           | One phase                                 |
| 39 | C-M-5           | MA                     | 5 x                                  | 240                       | NA           | One phase                                 |
| 40 | C-M-10          | MA                     | 10 x                                 | 240                       | NA           | One phase                                 |

\*Not

applicable

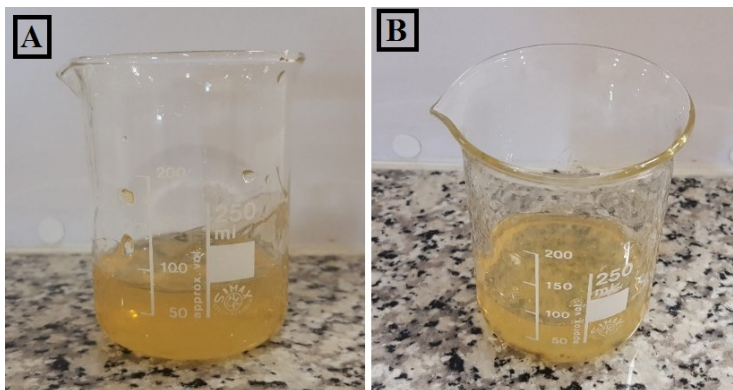

Figure S1- Clear yellowish viscous dialyzed GelMA solutions, A: GMA-GelMA and B: MA-GelMA.

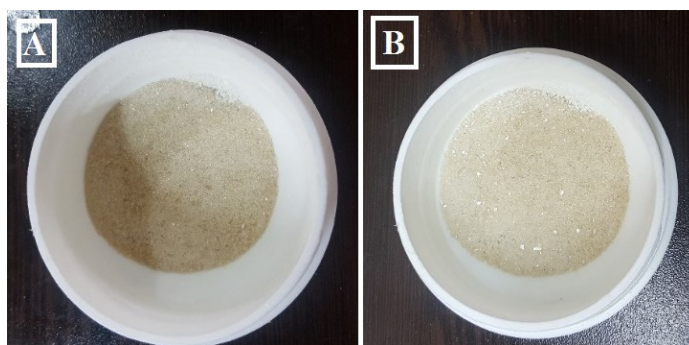

Figure S2- MWA-synthesized GelMA powder after freeze-dry, A: GMA-GelMA and B: MA-GelMA.

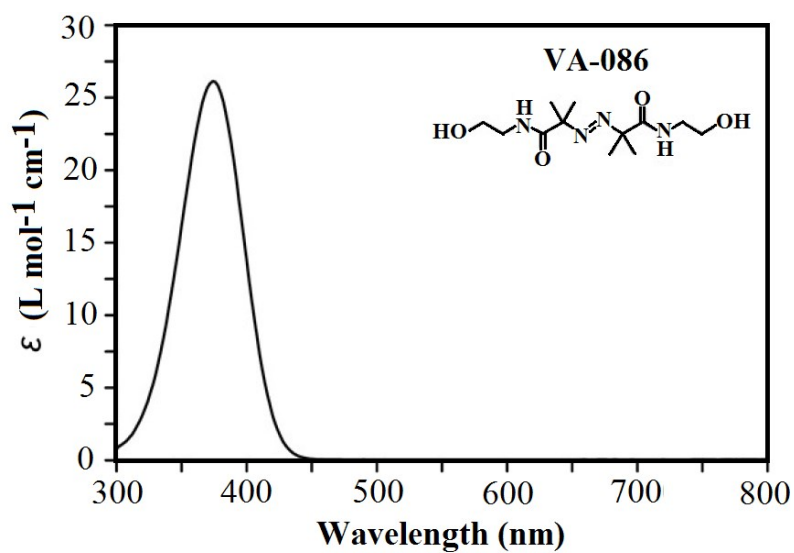

Figure S3- UV-Vis spectrum and molar absorptivity of the VA-086 ( $\epsilon_{374} = 26.12 \text{ L mol}^{-1}\text{cm}^{-1}$ ) in DMSO solvent (0.1 mol/L).

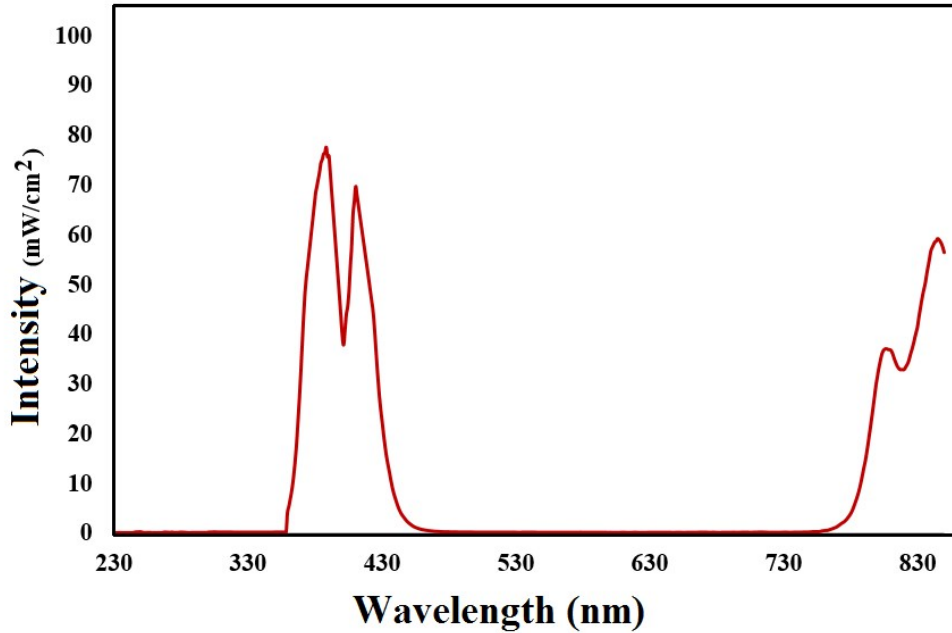

Figure S4- Spectral power distribution of custom-made blue LED light source.

## SS1- Dielectric Constant ( $\epsilon_r$ ) calculation method

$\epsilon_r$ , the ability of materials to absorb and store the electrical potential energy, is defined as the ratio of the electric permeability of the material to the vacuum electric permeability. Also,  $\epsilon_r$  can be calculated according to Equation S1.<sup>1</sup>

$$\epsilon_r = 1 + [1 / (3 V K_B T \epsilon_0)] (\langle \mu^2 \rangle - \langle \mu \rangle^2) \quad \text{Equation S1}$$

$V$ ,  $T$ ,  $k_B$ ,  $\epsilon_0$ ,  $\langle \mu^2 \rangle$  and  $\langle \mu \rangle^2$  are volume, temperature (K), Boltzmann's constant, vacuum dielectric constant, the average value of dipole moment squared, and the square of the mean dipole moment values, respectively.

## SS2- Dipole moment calculation procedures

The BIOVIA Material Studio 2017 software (2017.1.0.48, Accelrys Inc., USA) was run to simulate the molecular structures and calculate the total energy to estimate the dipole moment ( $\mu$ ) of GMA and MA as the quantum properties. Steps:

- 1) Drawing the GMA and MA molecular structures in the 3D atomistic media.
- 2) Optimizing the molecular structure geometrically (Module: Forcite/ task: Geometry Optimization/ Forcefield: COMPASS/ Quality: Ultra-fine).
- 3) Identifying all of the possible molecule conformers and their total energy (Module: Conformer/ task: conformer Calculation/ Forcefield: COMPASS).
- 4) Calculating the  $\mu$  average value of all of these possible conformers.

## SS3- Dipole moment calculation of GMA

### SS3-1- Geometric optimization of GMA

---- Energy parameters ----

Forcefield : COMPASS  
Charges : Forcefield assigned

#### Electrostatic terms:

Summation method : Atom based  
Truncation method : Cubic spline  
Cutoff distance : 18.5 A  
Spline width : 1 A  
Buffer width : 0.5 A

#### van der Waals terms:

Summation method : Atom based  
Truncation method : Cubic spline  
Cutoff distance : 18.5 A  
Spline width : 1 A  
Buffer width : 0.5 A

#### Geometry optimization status

Total energy : 99.420520 kcal/mol

Contributions to total energy (kcal/mol):

**Valence energy (diag. terms) : 80.002**

Bond : 2.019  
Angle : 117.209  
Torsion : -39.227  
Inversion : 0.000

**Valence energy (cross terms) : -8.818**

Stretch-Stretch : -0.025  
Stretch-Bend-Stretch : -0.737  
Stretch-Torsion-Stretch : -0.241

|                           |   |               |
|---------------------------|---|---------------|
| Separated-Stretch-Stretch | : | 0.000         |
| Torsion-Stretch           | : | -0.831        |
| Bend-Bend                 | : | -0.498        |
| Torsion-Bend-Bend         | : | -6.508        |
| Bend-Torsion-Bend         | : | 0.022         |
| <b>Non-bond energy</b>    | : | <b>28.237</b> |
| van der Waals             | : | 3.212         |
| Electrostatic             | : | 25.024        |

rms force : 1.246E-004 kcal/mol/A

max force : 3.678E-004 kcal/mol/A

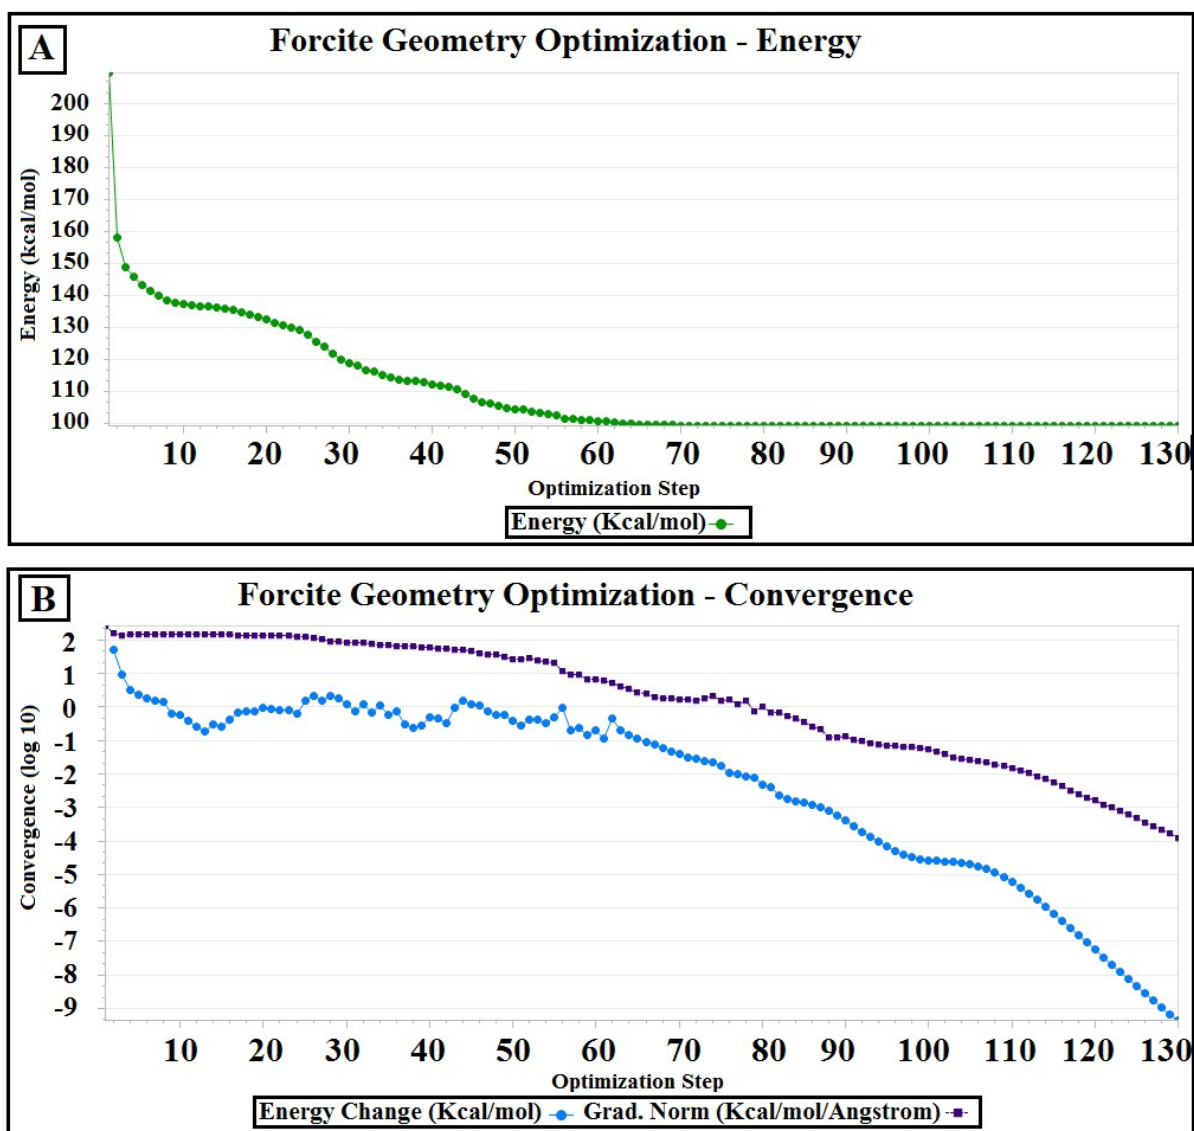

Figure S5- Forcite geometry optimization A: Energy and B: Convergence of GMA.

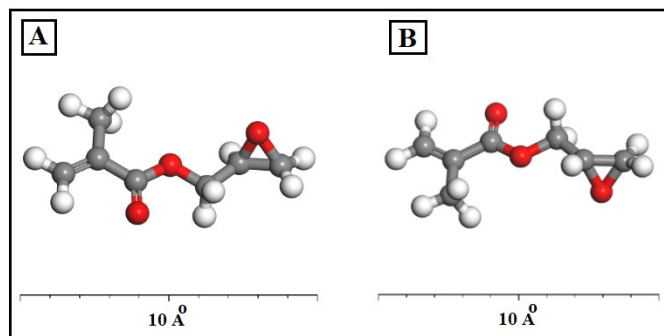

Figure S6- Geometry optimized molecular structures of GMA.

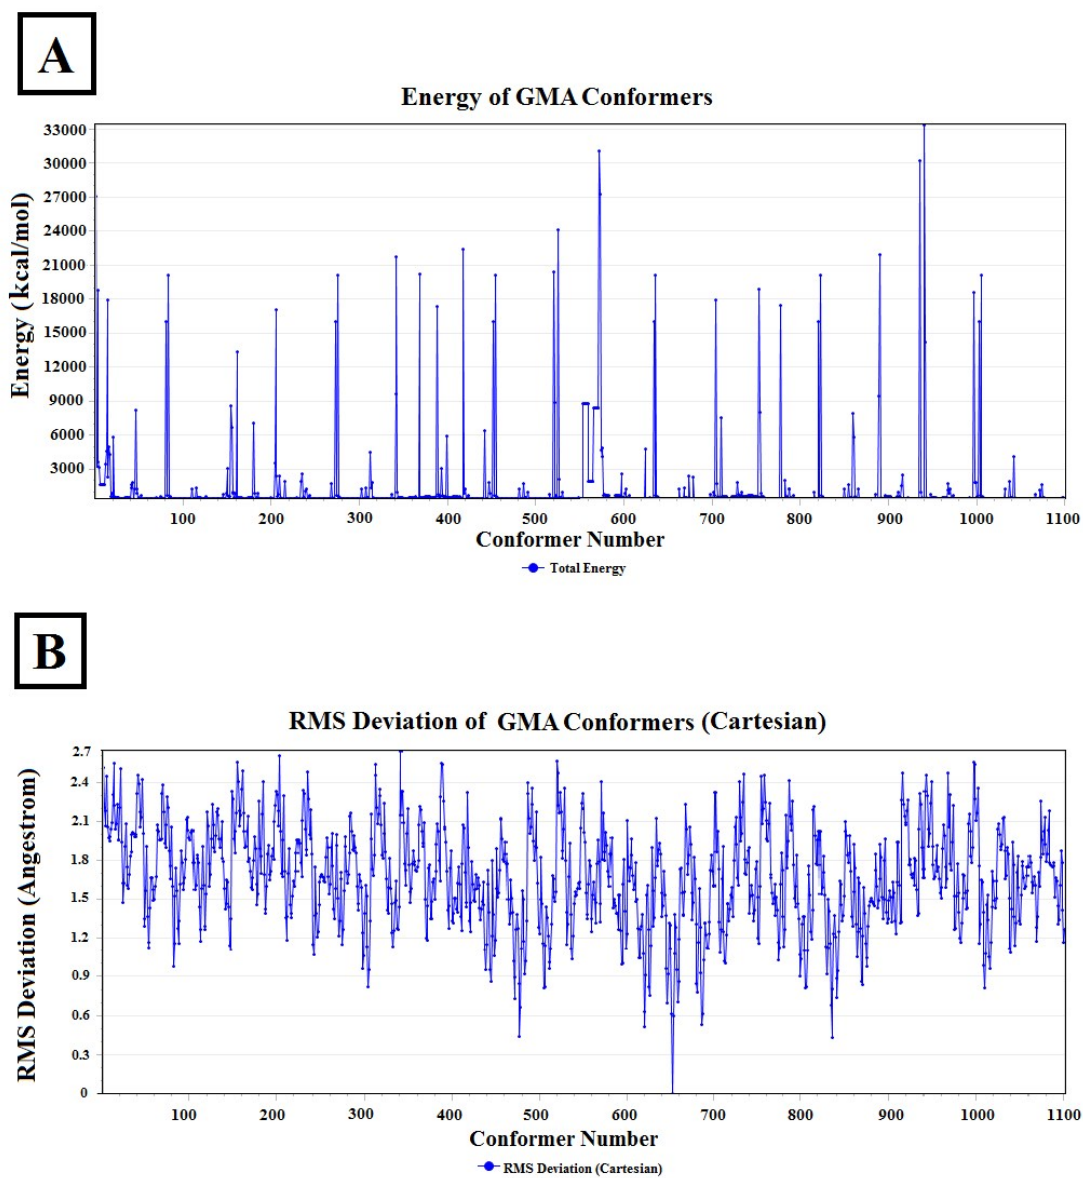

Figure S7- A: Energy and B: RMS deviation of all of the possible spatial conformers of GMA.

## SS3-2- Conformers and dipole moment of GMA

### ---- Conformer Search Status ----

Progress: 100% (1296/1296 conformers)

1296 conformers are sterically allowed.

Number accepted: 85% (1101 conformers)

Module : Conformers

### ---- Search Parameters ----

Search method : Systematic grid scan

H-bond scale factor : 0.4

Anchor atom ID : -1

Perturb from : Perturb reference

VdW radii scale factor : 0.4

Vicinal radii scale factor : 0.4

### ---- Energy parameters ----

Forcefield : COMPASS

Charges : Use current

#### **Electrostatic terms:**

Summation method : Atom based

Truncation method : Cubic spline

Cutoff distance : 18.5 A

Spline width : 1 A

Buffer width : 0.5 A

#### **van der Waals terms:**

Summation method : Atom based

Truncation method : Cubic spline

Cutoff distance : 18.5 A

Spline width : 1 A

Buffer width : 0.5 A



## SS4- Dipole moment calculation of MA

### SS4-1- Geometric optimization of MA

#### ---- Energy parameters ----

Forcefield : COMPASS  
Charges : Use current

#### Electrostatic terms:

Summation method : Atom based  
Truncation method : Cubic spline  
Cutoff distance : 18.5 A  
Spline width : 1 A  
Buffer width : 0.5 A

#### van der Waals terms:

Summation method : Atom based  
Truncation method : Cubic spline  
Cutoff distance : 18.5 A  
Spline width : 1 A  
Buffer width : 0.5 A

#### Geometry optimization status

**Total energy : 18.568365 kcal/mol**

Contributions to total energy (kcal/mol):

**Valence energy (diag. terms) : 6.970**

Bond : 1.561  
Angle : 4.547  
Torsion : 0.814  
Inversion : 0.048

**Valence energy (cross terms) : -8.818**

Stretch-Stretch : -0.025  
Stretch-Bend-Stretch : -0.737  
Stretch-Torsion-Stretch : -0.241  
Separated-Stretch-Stretch : 0.000  
Torsion-Stretch : -0.831  
Bend-Bend : -0.498  
Torsion-Bend-Bend : -6.508  
Bend-Torsion-Bend : 0.022

**Non-bond energy : 20.416**

van der Waals : 20.416  
Electrostatic : 0.000

rms force : 1.350E-004 kcal/mol/A

max force : 6.868E-004 kcal/mol/A

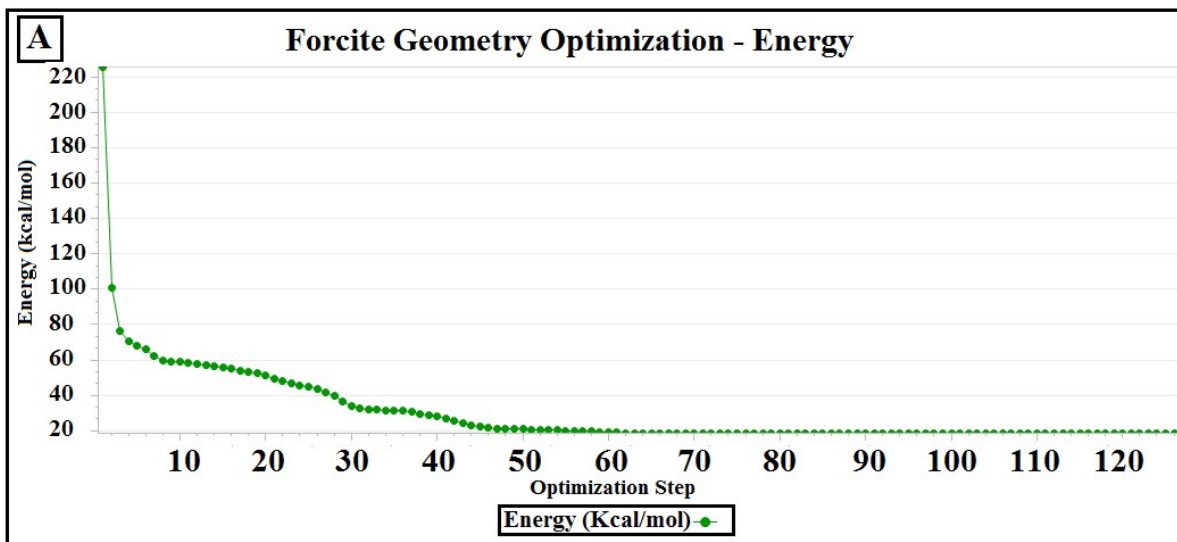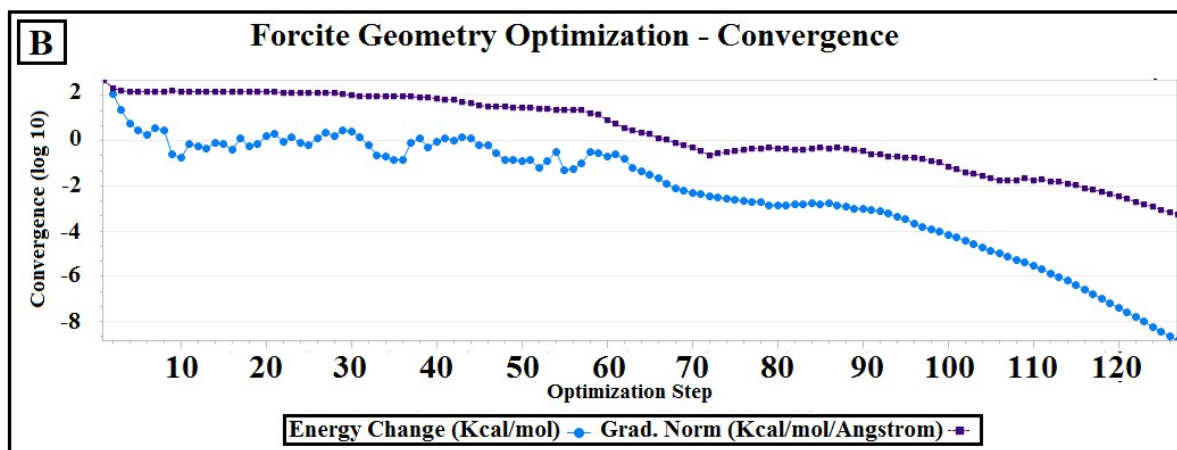

Figure S8- Forcite geometry optimization A: Energy and B: Convergence of MA.

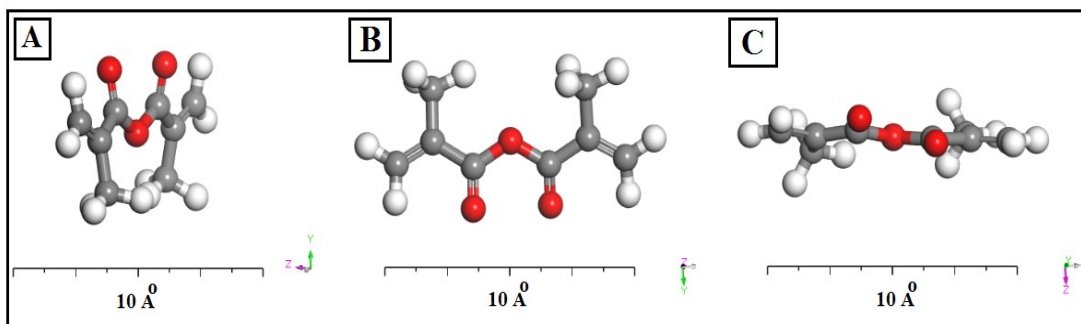

Figure S9- Geometry optimized molecular structures of MA.

**A****Energy of MA Conformers**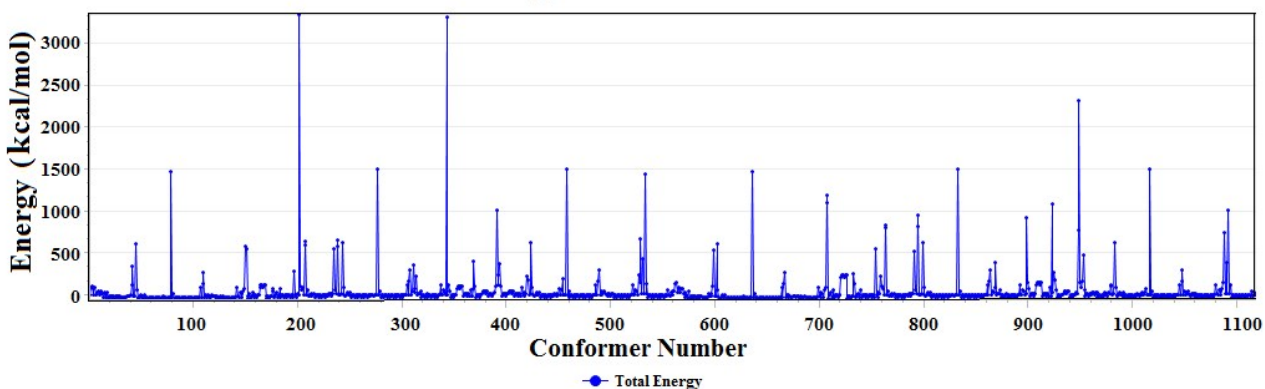**B****RMS Deviation of MA Conformers (Cartesian)**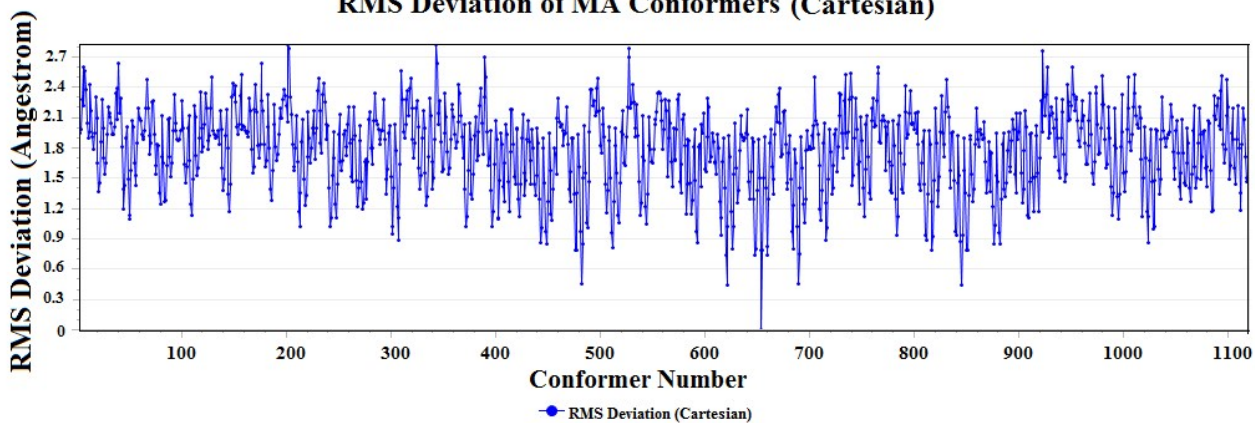**Figure S10- A: Energy and B: RMS deviation of all of the possible spatial conformers of MA.****SS4-2- Conformers and dipole moment of MA****---- Conformer Search Status ----**

Progress: 100% (1296/1296 conformers)

1296 conformers are sterically allowed.

Module : Conformers

**---- Search Parameters ----**

Search method : Systematic grid scan

H-bond scale factor : 0.4

Anchor atom ID : -1

Perturb from : Perturb reference

VdW radii scale factor : 0.4

Vicinal radii scale factor : 0.4

---- Energy parameters ----

Forcefield : COMPASS  
Charges : Forcefield assigned

**Electrostatic terms:**

Summation method : Atom based  
Truncation method : Cubic spline  
Cutoff distance : 18.5 Å  
Spline width : 1 Å  
Buffer width : 0.5 Å

**van der Waals terms:**

Summation method : Atom based  
Truncation method : Cubic spline  
Cutoff distance : 18.5 Å  
Spline width : 1 Å  
Buffer width : 0.5 Å

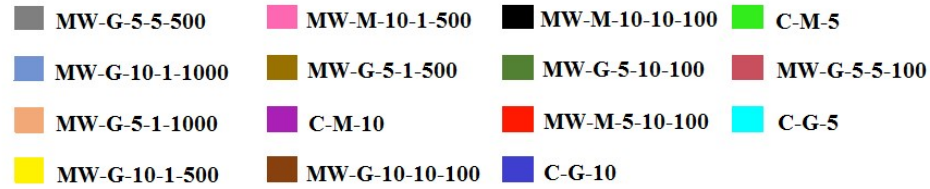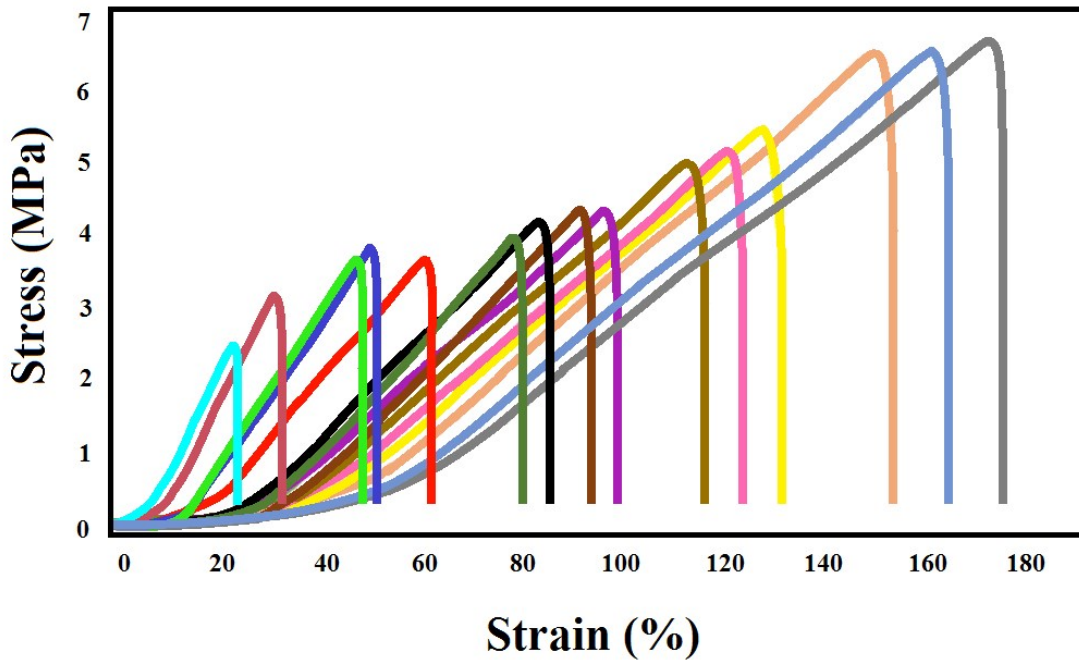

Figure S11- Tensile (stress-strain) curves of the LED-cured GelMA hydrogels.

## SR- Reference

- 1 L. Shen, L. Zou, M. Ding, T. Zhao, L. Zhang and Q. Li, Molecular Dynamics Simulation on Dielectric Constant and Thermal Conductivity of Crosslink Epoxy/functionalized graphene Nanocomposites, *Mater. Sci. Eng.*, 2020, **761**, 012009.
